# Supplementary material for: Manipulating the Prion Protein Gene Sequence and Expression Levels with CRISPR/Cas9
Source: PubMed Central journal article supplement (PMC4851410; doi:10.1371/journal.pone.0154604), 2016-04-29
Supplement: pone.0154604.s001.pdf [file pone.0154604.s001.pdf]

# Figure S1

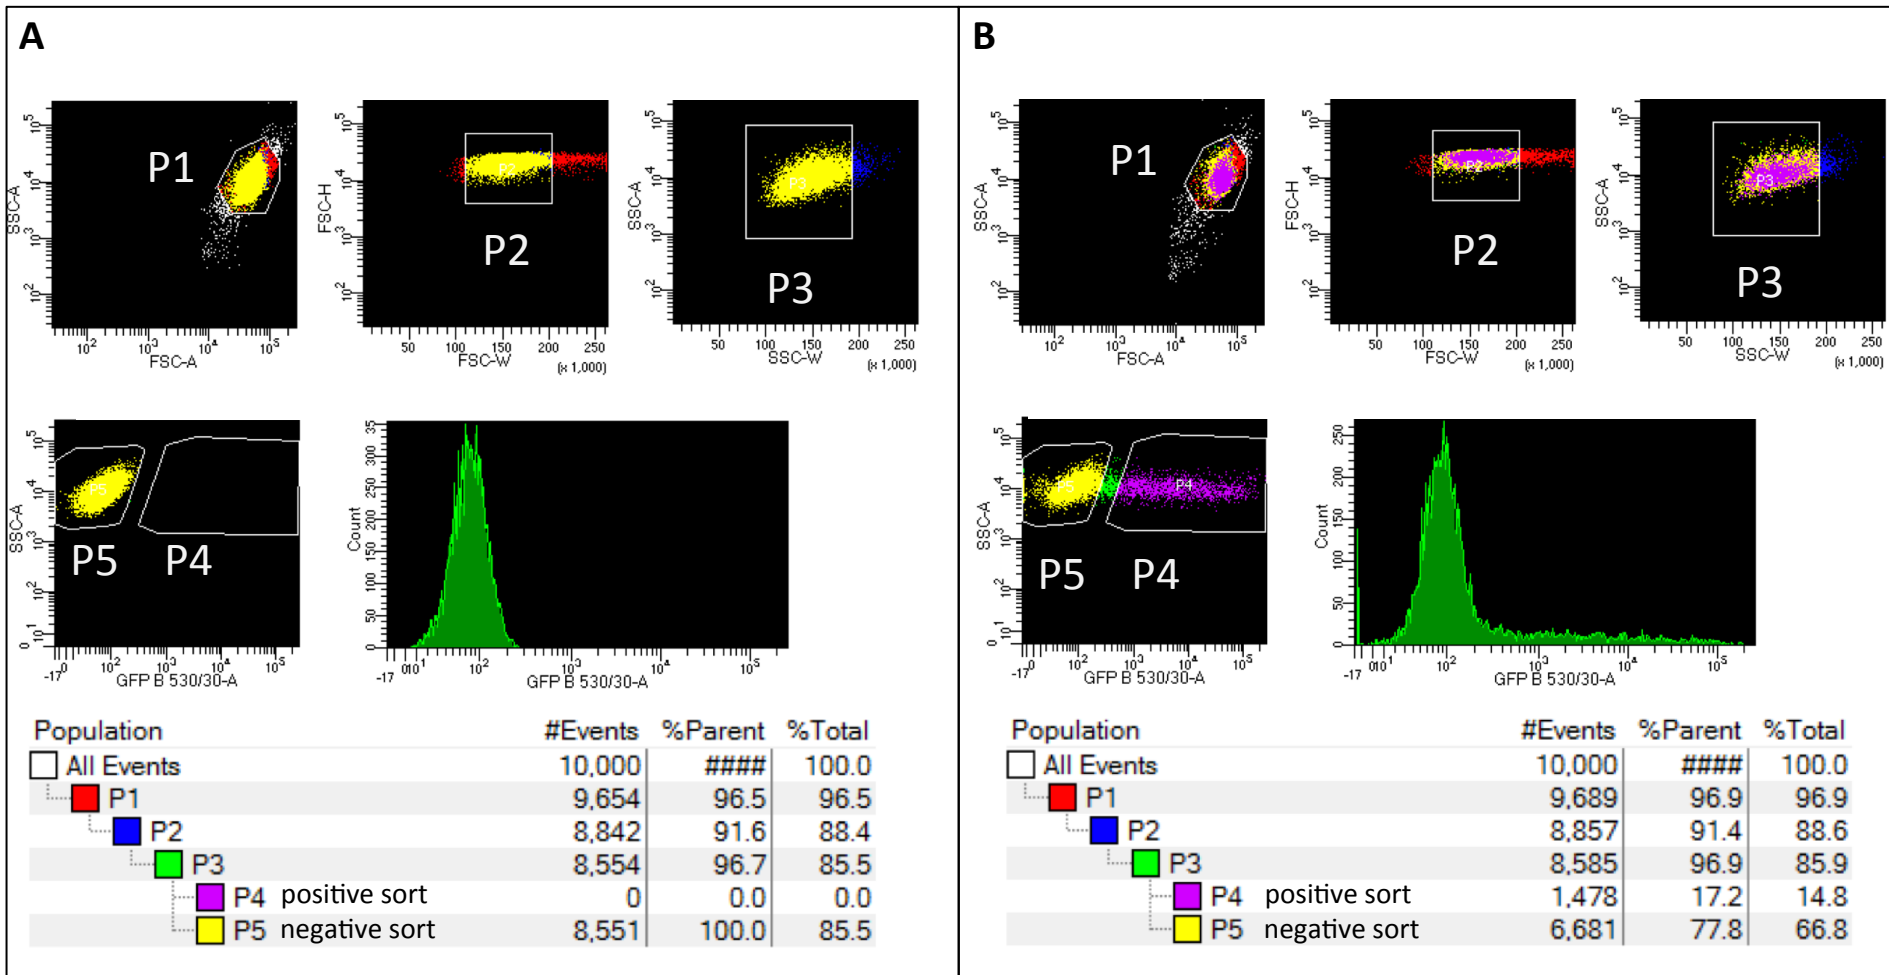

S1 Fig. **FACS sorting of N2a cells.** Plots for representative positive sample and negative control were shown.
