# Supplementary material for: Manipulating the Prion Protein Gene Sequence and Expression Levels with CRISPR/Cas9
Source: PubMed Central journal article supplement (PMC4851410; doi:10.1371/journal.pone.0154604), 2016-04-29
Supplement: pone.0154604.s003.pdf [file pone.0154604.s003.pdf]

| Guide name | Spacer sequence         | PAM | Strand    | Region targeted                   | sgRNA score [ref. 57] |
|------------|-------------------------|-----|-----------|-----------------------------------|-----------------------|
| HR Prnp 1  | GCCCGGGATACCGGCTTCCAC   | CGG | antisense | 103 nucleotide of ORF             | 0.31                  |
| HR Prnp 2  | GGATCTTCTCCCGTCGTAAT    | AGG | antisense | 673 nucleotide of ORF             | 0.21                  |
| HR Prnp 3  | GCGAGACCGATGTGAAGATGA   | TGG | sense     | 610 nucleotide of ORF             | 0.16                  |
| HR Prnp 4  | GATATTGCATGGTTGTTACGCCA | TGG | antisense | 255 nucleotide upstream of exon 3 | 0.18                  |
| HR Prnp 5  | GACCAGACGTGGTTTACCAGT   | TGG | sense     | 212 nucleotide upstream of exon 3 | 0.22                  |
| HR Prnp 6  | GAACCTGGCTACTGGCTGC     | TGG | sense     | 33 nucleotide of ORF              | 0.01                  |

S2 Table. **CC9 guide sequences used to stimulate HR in Prnp locus.** PAM – protospacer adjacent motif.
